# Supplementary material for: Subclassification, survival prediction and drug target analyses of chemotherapy-naïve muscle-invasive bladder cancer with a molecular screening
Source: PubMed Central journal article supplement (PMC5995241; doi:10.18632/oncotarget.25407), 2018-05-25
Supplement: oncotarget-09-25935-s001.pdf [file oncotarget-09-25935-s001.pdf]

# Subclassification, survival prediction and drug target analyses of chemotherapy-naïve muscle-invasive bladder cancer with a molecular screening

## SUPPLEMENTARY MATERIALS

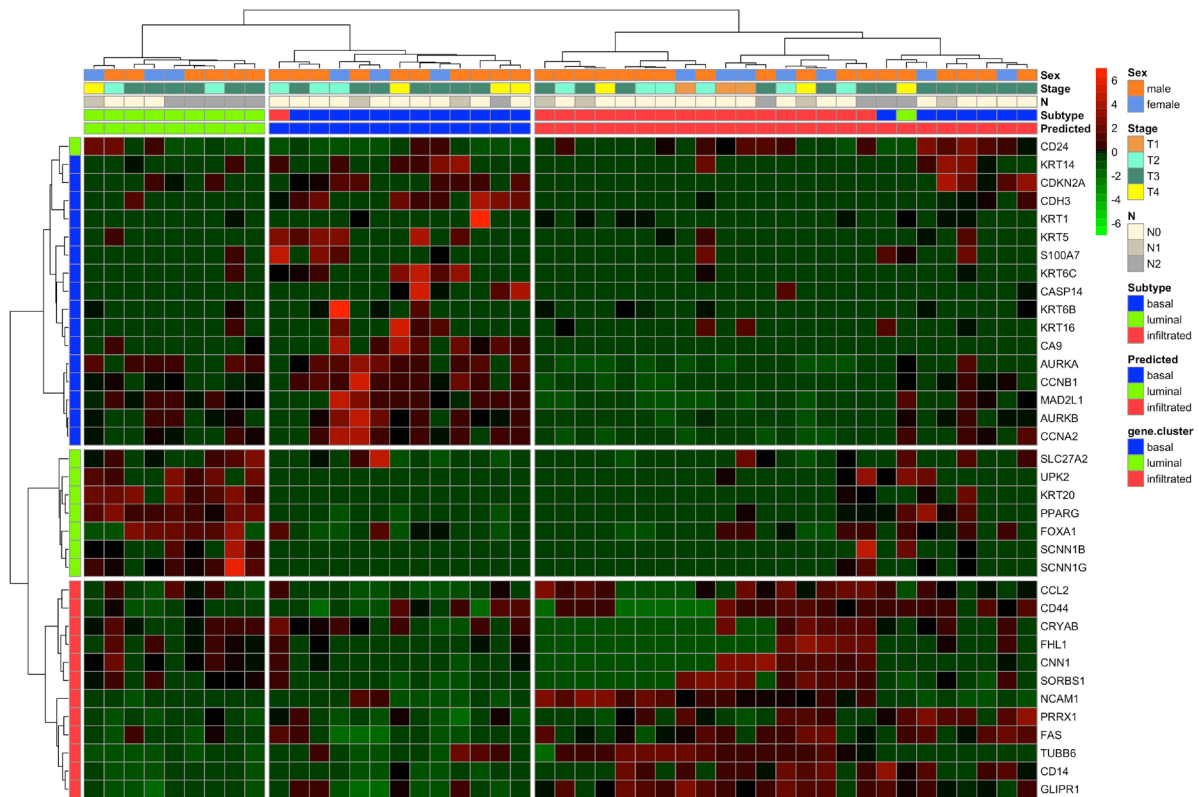

Supplementary Figure 1: Initial nCounter gene panel including 64 biomarkers, known to be enriched in the luminal, basal and p53-like (here termed as infiltrated) MIBC subtypes.

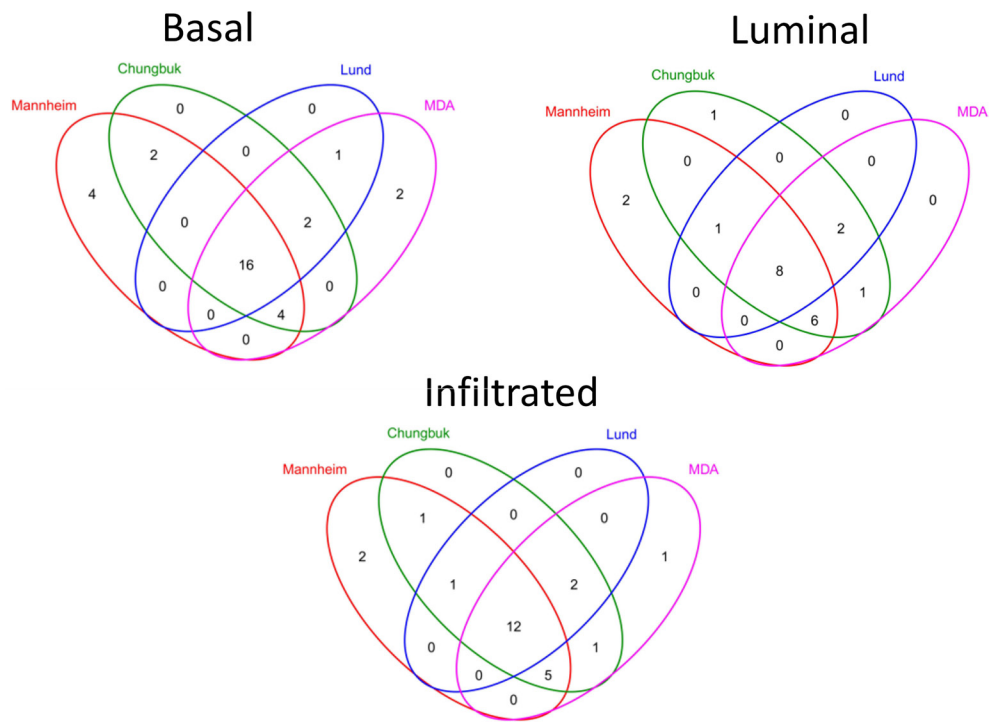

**Supplementary Figure 2: The overlay of the basal, luminal and p53-like subtypes from the Mannheim, Lund, MDA and Chungbuk cohort resulted in a reduced consensus gene panel of 36 stable clustering genes.**

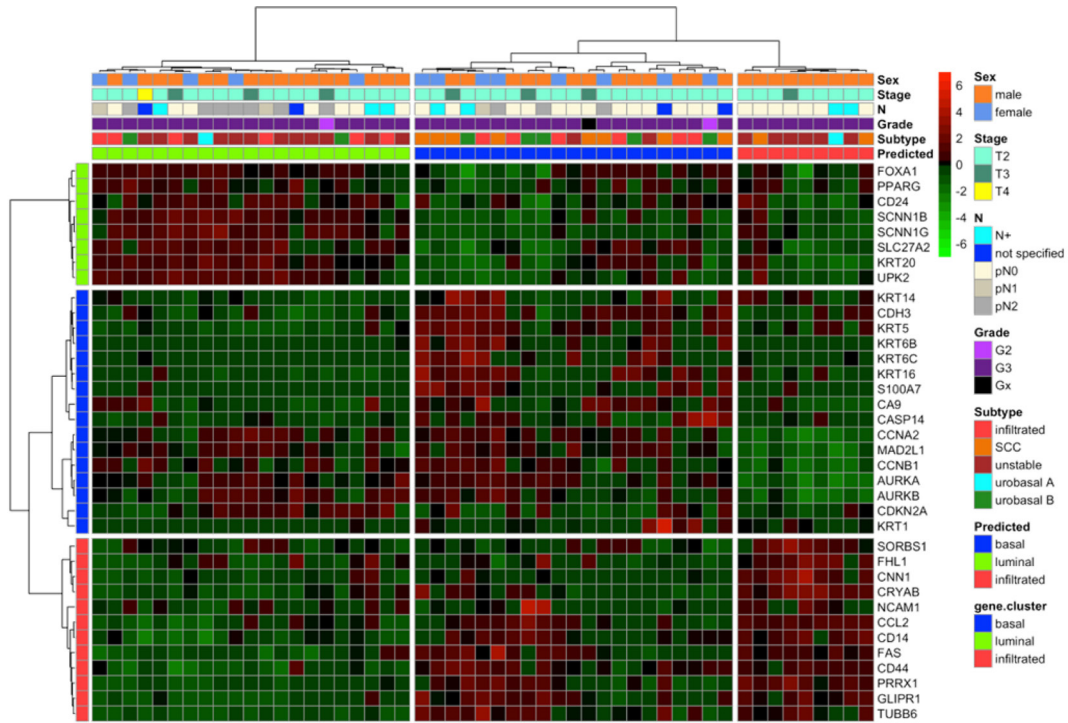

**Supplementary Figure 3: MIBC subtype classification of the Lund cohort by gene expression profiling of the reduced consensus geneset based on in silico microarray data (n=51, GSE32894).** Survival analyses have not been performed as no detailed treatment, histology and reason of death data were available.

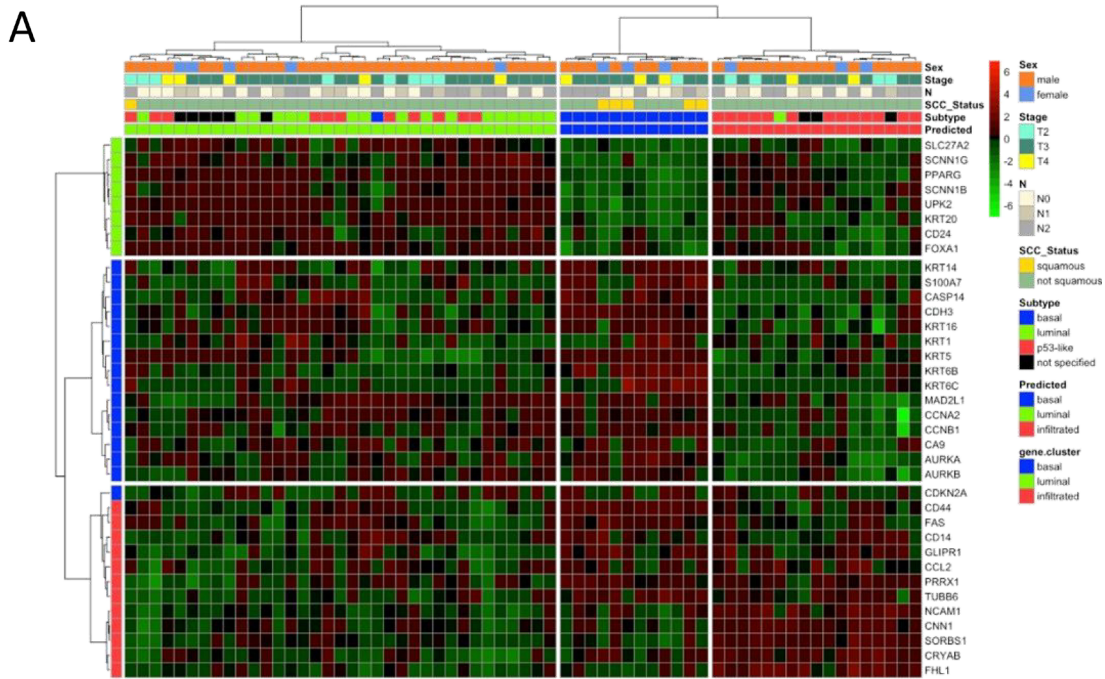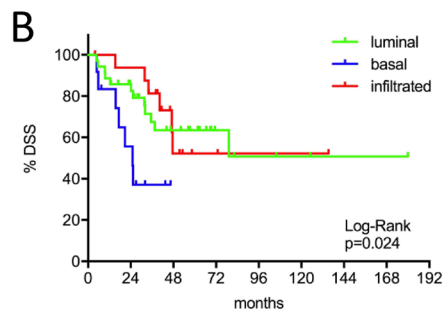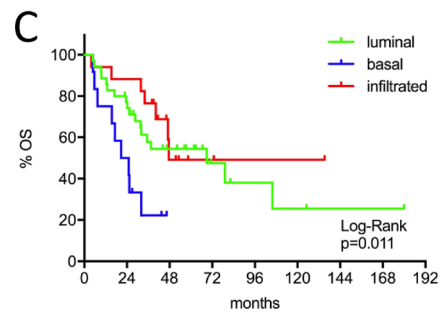

**Supplementary Figure 4:** (A) MIBC subtype classification of the MDA cohort (n=64) including squamous cell carcinoma, by gene expression profiling of the reduced consensus geneset based on in silico microarray data (GSE48276). (B, C) Kaplan-Meier plots of overall survival (OS) and disease specific survival (DSS) of the basal, luminal and infiltrated subtype.

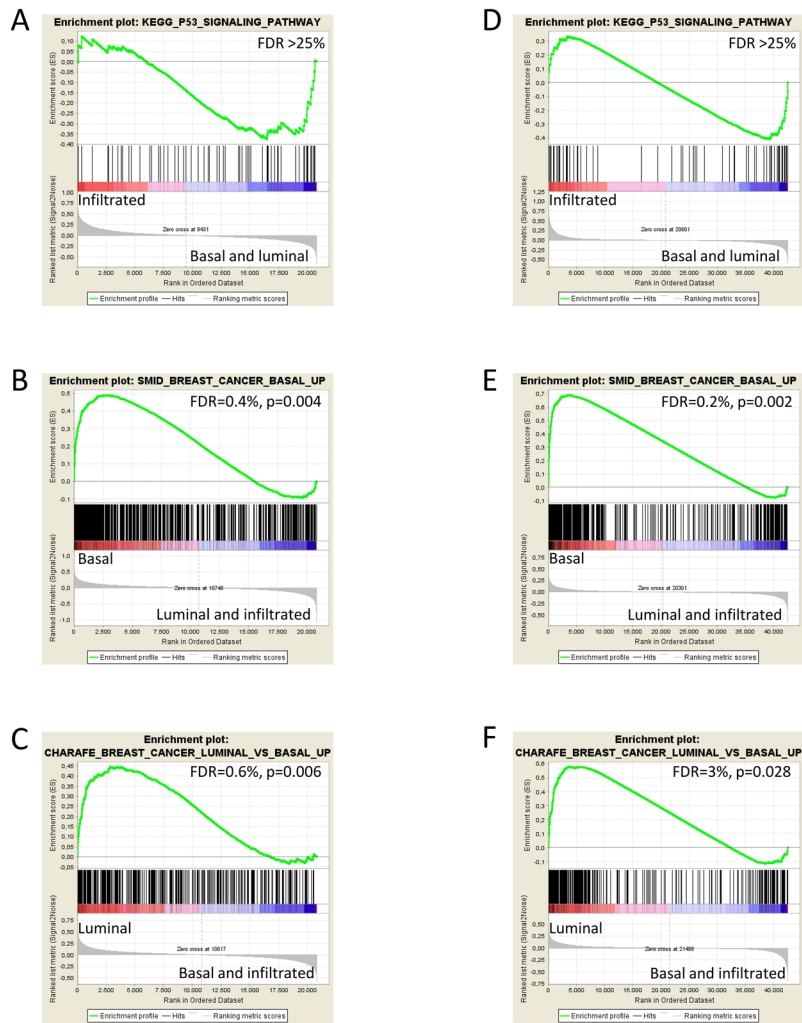

**Supplementary Figure 5: Gene set enrichment analysis of the TP53 pathway from KEGG database and curated basal and luminal gene signatures publically available on MsigDB (MDA: A, B, C, Chungbuk:D, E, F). In both cohorts, the TP53 gene signature showed no enrichment (A, D). The MDA cohort (B, C) and the Chungbuk cohort (E, F) showed a highly significant enrichment of basal and luminal biomarkers in their respective basal and luminal subtypes defined by the reduced gene panel.**

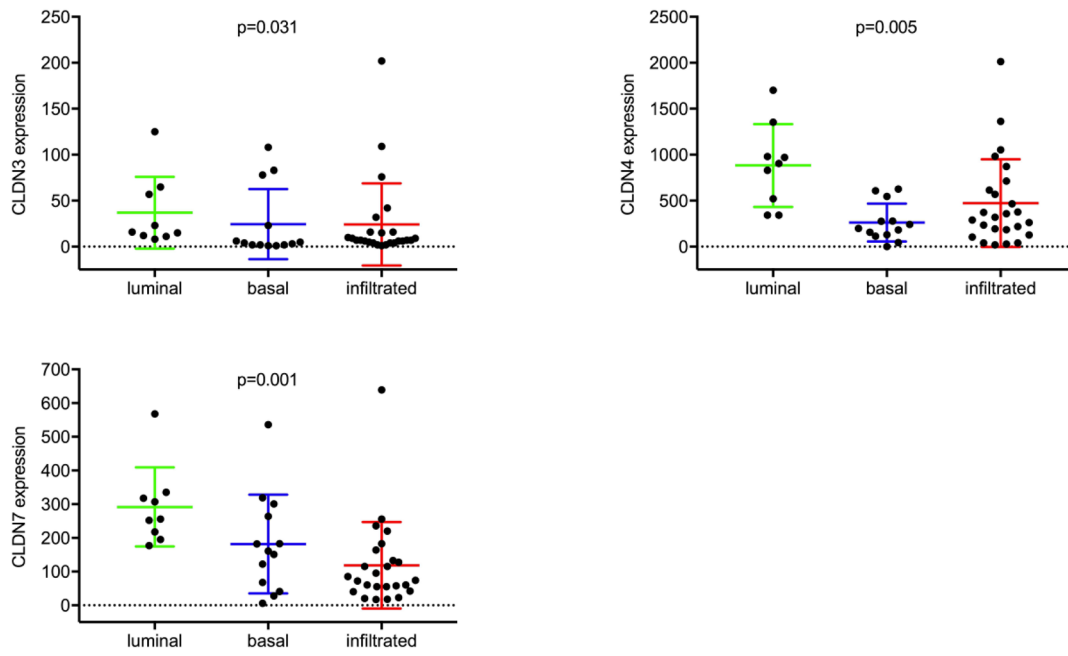

**Supplementary Figure 6: Claudin 3, 4 and 7 were tested for their subtype specific expression.** Absolute quantification of transcript levels was based on normalized nCounter counts. The basal and infiltrated subtypes showed a claudin-low molecular phenotype.

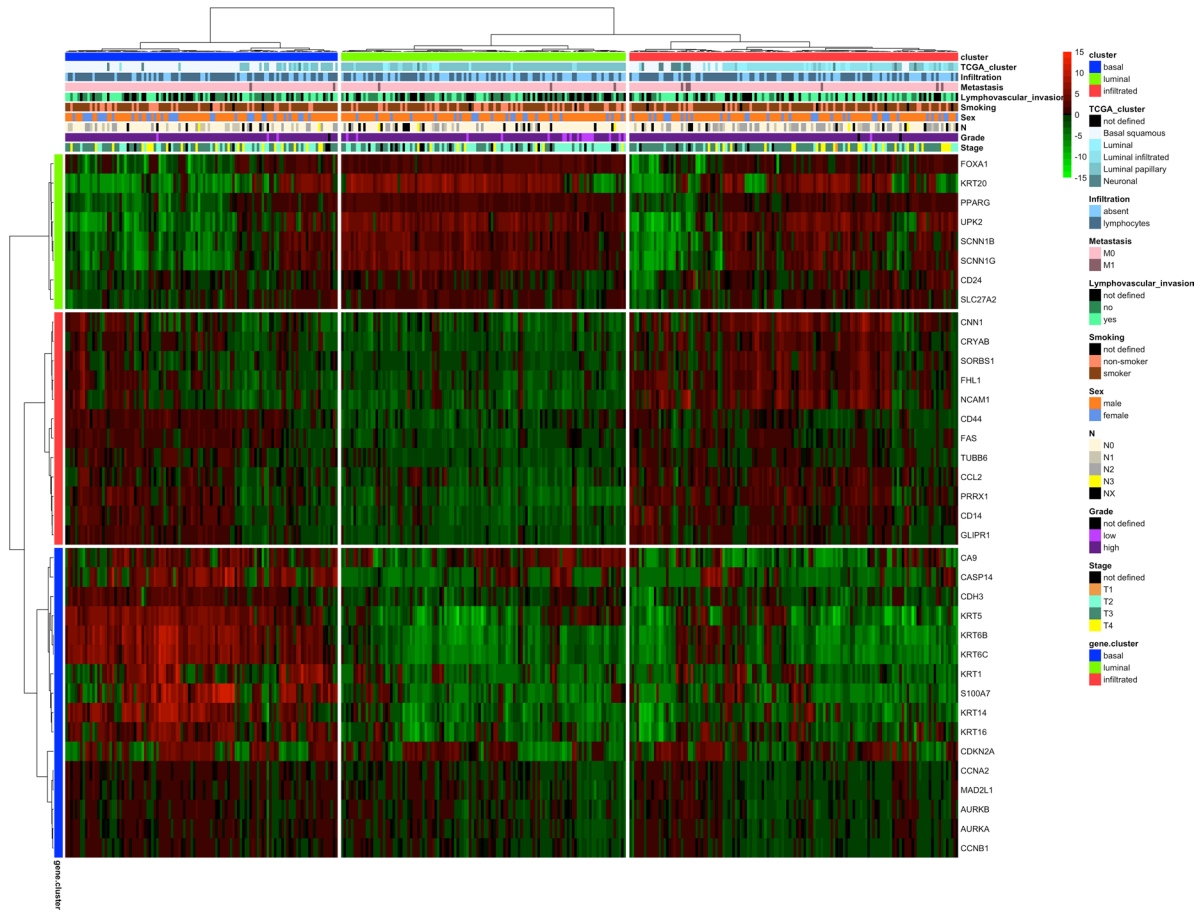

**Supplementary Figure 7: MIBC subtype classification of the TCGA cohort by gene expression profiling of the reduced consensus geneset based on in silico RNA-Seq data (n=364, cBioportal). Exclusively transitional cell carcinoma are assessed. Survival analyses have not been performed as no detailed treatment and reason of death data were available.**

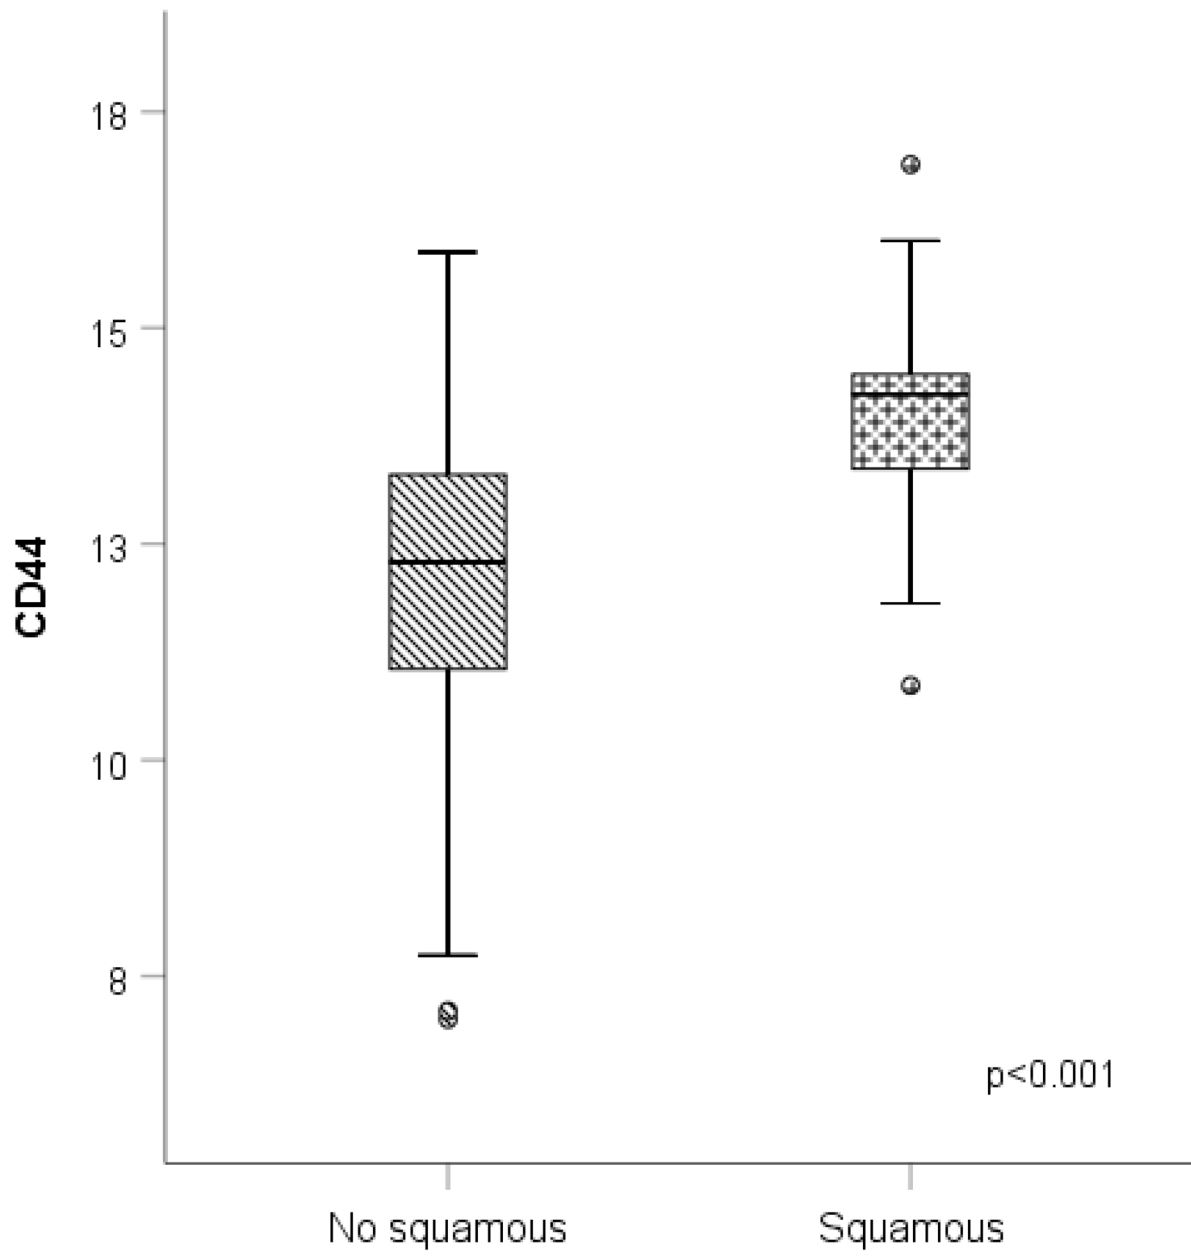

**Supplementary Figure 8: Differential expression of CD44 between squamous (n=45) and non-squamous (n=364) carcinoma of the TCGA cohort ( $p < 0.001$ ).**



**Supplementary Table 1: Clinicopathologic characteristics of the MDA cohort**

| <b>Cohort characteristics</b> | <b>Total</b> | <b>(%)</b> | <b>Luminal</b> | <b>(%)</b> | <b>Basal</b> | <b>(%)</b> | <b>Infiltrated</b> | <b>(%)</b> | <b>p-value</b> |
|-------------------------------|--------------|------------|----------------|------------|--------------|------------|--------------------|------------|----------------|
| Cohort size                   | 58           |            | 31             | (53)       | 12           | (21)       | 15                 | (26)       |                |
| Median age                    | 68           |            | 63             |            | 70           |            | 69                 |            | 0.305          |
| Female                        | 9            | (16)       | 5              | (16)       | 1            | (8)        | 3                  | (20)       | 0.801          |
| Male                          | 49           | (85)       | 26             | (84)       | 11           | (92)       | 12                 | (80)       |                |
| <b>TNM Stage</b>              |              |            |                |            |              |            |                    |            |                |
| pT2                           | 13           | (22)       | 6              | (19)       | 2            | (17)       | 5                  | (33)       | 0.463          |
| pT3                           | 35           | (60)       | 21             | (68)       | 6            | (50)       | 8                  | (53)       |                |
| pT4                           | 10           | (17)       | 4              | (13)       | 4            | (33)       | 2                  | (13)       |                |
| pN+                           | 36           | (62)       | 20             | (65)       | 7            | (58)       | 9                  | (60)       | 0.938          |
| cM+                           | 2            | (3)        | 2              | (7)        | 0            | (0)        | 0                  | (0)        | 1.000          |
| <b>Additional Therapy</b>     |              |            |                |            |              |            |                    |            |                |
| NAC (n=39)                    | 9            | (23)       | 6              | (26)       | 0            | (0)        | 3                  | (43)       | 0.097          |
| <b>Histology</b>              |              |            |                |            |              |            |                    |            |                |
| Urothelial                    | 46           | (79)       | 23             | (74)       | 10           | (83)       | 13                 | (87)       | 0.629          |
| Other                         | 12           | (21)       | 8              | (26)       | 2            | (17)       | 2                  | (13)       |                |

NAC = neoadjuvant chemotherapy.

**Supplementary Table 2: Clinicopathologic characteristics of the Chungbuk cohort**

| <b>Cohort characteristics</b> | <b>Total</b> | <b>(%)</b> | <b>Luminal</b> | <b>(%)</b> | <b>Basal</b> | <b>(%)</b> | <b>Infiltrated</b> | <b>(%)</b> | <b>p-value</b> |
|-------------------------------|--------------|------------|----------------|------------|--------------|------------|--------------------|------------|----------------|
| Cohort size                   | 61           |            | 31             | (51)       | 13           | (21)       | 16                 | (28)       |                |
| Median age                    | 66           |            | 67             |            | 72           |            | 62                 |            | 0,036          |
| Female                        | 13           | (21)       | 8              | (26)       | 4            | (31)       | 1                  | (6)        | 0,141          |
| Male                          | 48           | (79)       | 23             | (74)       | 9            | (69)       | 16                 | (94)       |                |
| <b>TNM Stage</b>              |              |            |                |            |              |            |                    |            |                |
| pT2                           | 31           | (51)       | 14             | (45)       | 5            | (39)       | 12                 | (71)       | 0,025          |
| pT3                           | 19           | (31)       | 8              | (26)       | 8            | (62)       | 3                  | (18)       |                |
| pT4                           | 11           | (18)       | 9              | (29)       | 0            | (0)        | 2                  | (12)       |                |
| pN+ (n=60)                    | 14           | (23)       | 6              | (19)       | 5            | (39)       | 3                  | (19)       | 0,433          |
| cM+                           | 6            | (10)       | 4              | (13)       | 0            | (0)        | 2                  | (12)       | 0,535          |
| <b>Additional Therapy</b>     |              |            |                |            |              |            |                    |            |                |
| AC                            | 26           | (43)       | 15             | (48)       | 4            | (31)       | 7                  | (41)       | 0.553          |

AC = adjuvant chemotherapy.
